# Supplementary material
Source: PubMed Central journal article supplement (PMC5969481)
Supplement: CJN.10850917SupplementaryData1.pdf [file CJN.10850917SupplementaryData1.pdf]

Jennifer E. Flythe, MD, MPH<sup>1,2</sup>, Tandra Hilliard, PhD<sup>3</sup>, Graciela Castillo, MPH<sup>3</sup>, Kourtney Ikeler<sup>3</sup>,  
Jazmine Orazi, MPH<sup>3</sup>, Emaad Abdel-Rahman, MD, PhD<sup>4</sup>, Amy Barton Pai, PharmD<sup>5</sup>, Matthew B.  
Rivara, MD<sup>6,7</sup>, Wendy L. St. Peter, PharmD<sup>8,9</sup>, Steven D. Weisbord, MD<sup>10,11,12</sup>, Caroline Wilkie, BA<sup>13</sup> and  
Rajnish Mehrotra, MD<sup>6,7</sup>

1. University of North Carolina Kidney Center, Division of Nephrology and Hypertension, Department of Medicine, UNC School of Medicine, Chapel Hill, NC
2. Cecil G. Sheps Center for Health Services Research, University of North Carolina, Chapel Hill, NC
3. American Institutes for Research, Washington, D.C.
4. Division of Nephrology, Department of Medicine, University of Virginia Health System, Charlottesville, Virginia
5. University of Michigan College of Pharmacy, Ann Arbor, Michigan
6. Kidney Research Institute, Division of Nephrology, Department of Medicine, University of Washington, Seattle, WA
7. Harborview Medical Center, Division of Nephrology, Department of Medicine, University of Washington, Seattle, WA
8. Chronic Disease Research Group, Minneapolis Medical Research Foundation, Minneapolis, MN
9. University of Minnesota, College of Pharmacy, Minneapolis, MN
10. Renal-Electrolyte Division, Department of Medicine, University of Pittsburgh School of Medicine, Pittsburgh, PA
11. Center for Health Equity Research and Promotion, Veterans Affairs Pittsburgh Healthcare System, Pittsburgh, PA
12. Renal Section, Medicine Service Line, Veterans Affairs Pittsburgh Healthcare System, Pittsburgh, PA
13. Punta Gorda, FL
